# Supplementary material for: Assessing Urinary Metabolomics in Giant Pandas Using Chromatography/Mass Spectrometry: Pregnancy-Related Changes in the Metabolome
Source: Front Endocrinol (Lausanne). 2020 Apr 16;11:215. doi: 10.3389/fendo.2020.00215 (PMC7176934; doi:10.3389/fendo.2020.00215)
Supplement: Supplementary file 4 [file Table_4.xlsx]

## Sheet: Sheet1
Table S4 Differential metabolites were found in the positive-ion mode.
ID	MZ	RT	MS2Metabolite	Molecular weight	chemical_formula	VIP	t.test_p.value	ratio	wilcox.test_p.value	t.test_p.value_BHcorrect	wilcox.test_p.value_BHcorrect	roc	lowROC	upROC	sample	cv	regulated	Con_1	Con_2	Con_3	Con_4	Con_5	Con_6	Con_7	Con_8	pre_1	pre_2	pre_3	pre_4	pre_5	pre_6	pre_7	pre_8	QC_1	QC_2	QC_3	QC_12	QC_21	IsAnnotated	IsMS2ident	MS2superclass	MS2class	MS2hmd	MS2kegg	MS2lipidmaps	NumberMS1hmdb	MS1hmdbName	MS1hmdbID	MS1hmdbSuperClass
M104T53_2	104.106	0.87555	Choline	104.108	C5H14NO	1.8769	7.30222e-06	5.5165	0.0001554	0.000315	0.0016695	1	1	1	pre:Con	0.106651	up	3566.18	1562.85	1935.91	3037.21	2863.97	2926.18	3490.85	3321.43	11902.2	20078	34255.1	10654.8	6121.17	16201.7	15397.7	10639.2	6468.25	7349.77	7423.23	7729.87	5949.46	1	1	Organic nitrogen compounds	Organonitrogen compounds	HMDB0000097	C00114	-	13	Neurine;Iso-Valeraldehyde;Prenol;3-Methyl-3-buten-1-ol;Pentanal;(S)-2-Methylbutanal;(±)-2-Methylbutanal;(E)-2-Penten-1-ol;1-Penten-3-ol;Isoprenyl alcohol;2-Pentanone;2-Methyl-2-buten-1-ol;xi-3-Methyl-3-buten-2-ol	HMDB0031259;HMDB0006478;HMDB0030124;HMDB0030126;HMDB0031206;HMDB0031525;HMDB0031526;HMDB0031604;HMDB0031605;HMDB0033854;HMDB0034235;HMDB0034465;HMDB0039779	Alkaloids and derivatives;Organic oxygen compounds;Organooxygen compounds;Organic oxygen compounds;Organic oxygen compounds;Organic oxygen compounds;Organic oxygen compounds;Organic oxygen compounds;Organooxygen compounds;Organic oxygen compounds;Organic oxygen compounds;Organooxygen compounds;Organic oxygen compounds
M139T135	139.038	2.24743	4-Hydroxybenzoic acid	138.032	C7H6O3	1.54185	0.000323769	0.217768	0.0010878	0.00337417	0.00660115	0.953125	0.8125	1	pre:Con	0.212967	down	6556.07	12767.1	53566.1	46278.2	26118.5	28473.4	33548.1	22557.8	2594.34	4227.47	6450.44	6329.41	7861.62	3501.1	5619.91	13473	37498.8	33248.1	31407.5	36318.9	51928.1	1	1	Benzenoids	Benzene and substituted derivatives	HMDB0000500	C00156	-	9	4-Hydroxybenzoic acid;Salicylic acid;3-Hydroxybenzoic acid;keratan sulfate II (core 2-linked), degradation product 1;Gentisate aldehyde;2-Methoxy-1,4-benzoquinone;alpha-Furyl methyl diketone;Sesamol;3,4-Dihydroxybenzaldehyde	HMDB0000500;HMDB0001895;HMDB0002466;HMDB0062484;HMDB0004062;HMDB0032576;HMDB0032920;HMDB0033812;HMDB0059965	Benzenoids;Benzenoids;Benzenoids;Organic oxygen compounds;Organic oxygen compounds;Organic oxygen compounds;Organooxygen compounds;Organoheterocyclic compounds;Benzenoids
M148T269	148.039	4.48623	Indole-5,6-quinone	147.032	C8H5NO2	1.31653	0.0143253	2.5544	0.0379176	0.047872	0.100597	0.8125	0.59375	1	pre:Con	0.0559027	up	2673.06	13357.9	18368.6	7861.3	2595.7	2922.81	4080.64	3353.35	15700.5	30940.5	42143.9	7533.13	6326.98	11239	8991.98	18161.1	9150.92	9245.92	9133.54	9541.81	8197.15	1	1	Organoheterocyclic compounds	Indoles and derivatives	HMDB0006779	C05579	-	3	Indole-5,6-quinone;Agrocybin;1H-Indole-2,3-dione	HMDB0006779;HMDB0030481;HMDB0061933	Organoheterocyclic compounds;Organic acids and derivatives;Organoheterocyclic compounds
M155T170	155.033	2.83082	3,4-Dihydroxybenzoic acid	154.027	C7H6O4	1.13793	0.00189705	2.07661	0.004662	0.0110429	0.0196554	0.90625	0.71875	1	pre:Con	0.198415	up	5385.29	2114.61	2516.56	1686.66	1265.88	1911.97	3365.99	2757.98	4521.16	5291.64	5280.11	5812.8	8422.78	3151.32	3458.32	7680.83	3747.65	2395.86	2407	2639.18	2932.13	1	1	Benzenoids	Benzene and substituted derivatives	HMDB0001856	C00230	-	8	Gentisic acid;2-Pyrocatechuic acid;Protocatechuic acid;2,6-Dihydroxybenzoic acid;3,5-Dihydroxybenzoic acid;2,4-Dihydroxybenzoic acid;2,4,6-trihydroxybenzaldehyde;Patulin	HMDB0000152;HMDB0000397;HMDB0001856;HMDB0013676;HMDB0013677;HMDB0029666;HMDB0125090;HMDB0034299	Benzenoids;Benzenoids;Benzenoids;Benzenoids;Benzenoids;Benzenoids;Benzenoids;Organoheterocyclic compounds
M160T275	160.075	4.58841	Indole-3-acetaldehyde	159.068	C10H9NO	1.81495	1.98284e-08	4.14434	0.0001554	8.71103e-06	0.0016695	1	1	1	pre:Con	0.110419	up	5142.34	2873.79	2297.06	2825.24	2157.34	3347.38	2580.25	3072.18	16897	11342.8	8048.82	12568.1	12044.4	14042.8	14390.9	11354.3	6555.85	7718.26	6757.05	6696.22	5644.11	1	1	Organoheterocyclic compounds	Indoles and derivatives	HMDB0001190	C00637	-	2	N-Hydroxy-1-aminonaphthalene;Indoleacetaldehyde	HMDB0062503;HMDB0001190	Benzenoids;Organoheterocyclic compounds
M166T143	166.086	2.39086	L-Phenylalanine	165.079	C9H11NO2	1.30376	0.0047117	3.19517	0.000621601	0.0211565	0.00440486	0.96875	0.859375	1	pre:Con	0.19864	up	76829.5	68868.9	67329.7	69654.4	73289.2	67272.1	72660	75893.6	73825.4	114796	128885	339948	149240	342582	527824	149892	87182.8	111725	140071	142266	143164	1	1	Organic acids and derivatives	Carboxylic acids and derivatives	HMDB0000159	C00079	-	23	5-(3-Pyridyl)-2-hydroxytetrahydrofuran;L-Phenylalanine;3-Pyridinebutanoic acid;Benzocaine;Norsalsolinol;Gentiatibetine;Ethyl 2-aminobenzoate;Methyl N-methylanthranilate;Benzyl glycinate;4-Hydroxy-1-(3-pyridinyl)-1-butanone;3-phenylprop-2-enoic acid;3-(2-hydroxyphenyl)prop-2-enal;(2Z)-2-hydroxy-3-phenylprop-2-enal;(2E)-3-(3-hydroxyphenyl)prop-2-enal;3-phenyloxirane-2-carbaldehyde;3-(4-hydroxypheny…	HMDB0062407;HMDB0000159;HMDB0001007;HMDB0004992;HMDB0006044;HMDB0033485;HMDB0033589;HMDB0034169;HMDB0059934;HMDB0062402;HMDB0128078;HMDB0134039;HMDB0135273;HMDB0135274;HMDB0135275;HMDB0135648;HMDB0000567;HMDB0000930;HMDB0031725;HMDB0032947;HMDB0035243;HMDB0036626;HMDB0040986	Organoheterocyclic compounds;Organic acids and derivatives;Organoheterocyclic compounds;Benzenoids;Organoheterocyclic compounds;Organoheterocyclic compounds;Benzenoids;Benzenoids;Organic acids and derivatives;Organic oxygen compounds;Phenylpropanoids and polyketides;Phenylpropanoids and polyketides;Phenylpropanoids and polyketides;Phenylpropanoids and polyketides;Benzenoids;Phenylpropanoids and p…
M166T378	166.085	6.30772	Phenylalanine	165.079	C9H11NO2	1.09133	0.0144301	2.57697	0.0379176	0.0481112	0.100597	0.8125	0.578125	0.96875	pre:Con	0.193785	up	1443.11	619.325	669.414	475.168	500.523	825.354	1228.09	1501.89	1919.91	1392.72	696.091	3384.32	4833.73	1218.99	1161.54	4108.92	1902.08	1900.04	1647.28	1763.92	1121.1	1	1	Organic acids and derivatives	Carboxylic acids and derivatives	HMDB0000159	C00079	-	26	5-(3-Pyridyl)-2-hydroxytetrahydrofuran;L-Phenylalanine;3-Pyridinebutanoic acid;Benzocaine;Norsalsolinol;Gentiatibetine;Ethyl 2-aminobenzoate;Methyl N-methylanthranilate;Benzyl glycinate;4-Hydroxy-1-(3-pyridinyl)-1-butanone;Proline betaine;L-2-Amino-3-methylenehexanoic acid;3beta,6beta-Dihydroxynortropane;3-phenylprop-2-enoic acid;3-(2-hydroxyphenyl)prop-2-enal;(2Z)-2-hydroxy-3-phenylprop-2-enal;(…	HMDB0062407;HMDB0000159;HMDB0001007;HMDB0004992;HMDB0006044;HMDB0033485;HMDB0033589;HMDB0034169;HMDB0059934;HMDB0062402;HMDB0004827;HMDB0030410;HMDB0038949;HMDB0128078;HMDB0134039;HMDB0135273;HMDB0135274;HMDB0135275;HMDB0135648;HMDB0000567;HMDB0000930;HMDB0031725;HMDB0032947;HMDB0035243;HMDB0036626;HMDB0040986	Organoheterocyclic compounds;Organic acids and derivatives;Organoheterocyclic compounds;Benzenoids;Organoheterocyclic compounds;Organoheterocyclic compounds;Benzenoids;Benzenoids;Organic acids and derivatives;Organic oxygen compounds;Organic acids and derivatives;Organic acids and derivatives;Alkaloids and derivatives;Phenylpropanoids and polyketides;Phenylpropanoids and polyketides;Phenylpropano…
M169T82	169.035	1.36555	Uric acid	168.028	C5H4N4O3	1.2176	0.00847095	2.38211	0.014763	0.0324446	0.0477575	0.859375	0.625	1	pre:Con	0.15734	up	27350.7	146526	152228	56941.9	55109.4	55878.1	168207	142477	290460	358507	454426	118740	112914	171992	155054	254828	81135.5	124727	114612	115038	122104	1	1	Organoheterocyclic compounds	Imidazopyrimidines	HMDB0000289	C00366	-	1	Uric acid	HMDB0000289	Organoheterocyclic compounds
M176T306	176.07	5.09988	3-Indoleacetic acid	175.063	C10H9NO2	1.59773	0.00139129	3.06672	0.0001554	0.00898143	0.0016695	1	1	1	pre:Con	0.0213475	up	181995	70154	43994	29060.4	25961.7	44492.9	135522	161395	245881	218945	198919	308735	365216	217522	241782	326935	152113	155095	160674	158923	156053	1	1	Organoheterocyclic compounds	Indoles and derivatives	HMDB0000197	C00954	-	4	Indoleacetic acid;5-Hydroxyindoleacetaldehyde;Hydroxymethyl indol-3-yl ketone;1-Methoxy-1H-indole-3-carboxaldehyde	HMDB0000197;HMDB0004073;HMDB0038628;HMDB0040972	Organoheterocyclic compounds;Organoheterocyclic compounds;Organoheterocyclic compounds;Organoheterocyclic compounds
M179T105	179.07	1.74379	Coniferyl aldehyde	178.063	C10H10O3	1.73744	0.000443099	0.180753	0.000621601	0.00420327	0.00440486	0.96875	0.84375	1	pre:Con	0.243985	down	34968.8	19962.1	23947.4	6520.46	4200.93	6506.15	9354.03	24932.9	1978.18	2411.45	3319.83	1231.23	1622.86	4374.94	6028.83	2601.6	4624.11	5940.7	5370.46	6011	8575.75	1	1	-	-	METPA0314	C02666	-	28	1,2-Dihydroxy-3,4-epoxy-1,2,3,4-tetrahydronaphthalene;Ethyl Phenylglyoxylate;3-(3-methoxyphenyl)prop-2-enoic acid;(2E)-3-(3-methoxyphenyl)prop-2-enoic acid;methyl (2E)-3-(4-hydroxyphenyl)prop-2-enoate;4-(3,4-dihydroxyphenyl)but-3-en-2-one;(2Z)-2-(hydroxymethyl)-3-phenylprop-2-enoic acid;(2E)-3-(3-hydroxyphenyl)-2-methylprop-2-enoic acid;(2E)-3-(4-hydroxyphenyl)-2-methylprop-2-enoic acid;2-methyl-…	HMDB0062273;HMDB0062729;HMDB0125103;HMDB0125518;HMDB0131168;HMDB0133457;HMDB0133611;HMDB0133612;HMDB0133613;HMDB0133614;HMDB0133615;HMDB0134055;HMDB0135647;HMDB0135649;HMDB0135650;HMDB0135651;HMDB0141076;HMDB0141077;HMDB0141078;HMDB0002040;HMDB0030903;HMDB0031055;HMDB0033248;HMDB0038712;HMDB0038965;HMDB0039471;HMDB0141782;HMDB0029598	Benzenoids;Benzenoids;Unknow;Phenylpropanoids and polyketides;Phenylpropanoids and polyketides;Phenylpropanoids and polyketides;Phenylpropanoids and polyketides;Phenylpropanoids and polyketides;Phenylpropanoids and polyketides;Organoheterocyclic compounds;Phenylpropanoids and polyketides;Benzenoids;Phenylpropanoids and polyketides;Benzenoids;Benzenoids;Phenylpropanoids and polyketides;Phenylpropa…
M190T193	190.05	3.21788	Kynurenic acid	189.043	C10H7NO3	1.25351	0.000541193	2.36831	0.0010878	0.00480278	0.00660115	0.953125	0.8125	1	pre:Con	0.0339146	up	55440.9	57526.2	62070.4	114772	125595	106269	75796.2	66966.6	233670	137527	76175.3	239118	211708	232816	268098	174478	142597	130131	139816	138510	139014	1	1	Organoheterocyclic compounds	Quinolines and derivatives	HMDB0000715	C01717	-	3	Kynurenic acid;1-Nitronaphthalene-5,6-oxide;1-Nitronaphthalene-7,8-oxide	HMDB0000715;HMDB0060331;HMDB0060332	Organoheterocyclic compounds;Benzenoids;Benzenoids
M205T183_2	205.097	3.04783	Tryptophan	204.09	C11H12N2O2	1.87668	0.000874883	4.80204	0.0001554	0.0065465	0.0016695	1	1	1	pre:Con	0.0471336	up	3843.33	53602.8	79551.8	54686.8	42572.9	43816.6	57485.1	36015.1	91433.6	158439	218814	287357	201752	254299	349837	222383	114630	121747	116673	115178	127941	1	1	Organoheterocyclic compounds	Indoles and derivatives	HMDB0030396	C00806	-	10	L-Tryptophan;D-Tryptophan;3-Hydroxymethylantipyrine;Ethotoin;(±)-Tryptophan;Nirvanol;4-Hydroxyantipyrine;S-nirvanol;6-Chloro-N-(1-methylethyl)-1,3,5-triazine-2,4-diamine;Indoleacrylic acid	HMDB0000929;HMDB0013609;HMDB0013840;HMDB0014892;HMDB0030396;HMDB0060533;HMDB0060878;HMDB0060967;HMDB0033249;HMDB0000734	Organoheterocyclic compounds;Organoheterocyclic compounds;Organoheterocyclic compounds;Organoheterocyclic compounds;Organoheterocyclic compounds;Organoheterocyclic compounds;Organoheterocyclic compounds;Organoheterocyclic compounds;Organoheterocyclic compounds;Organoheterocyclic compounds
M206T227	206.044	3.78812	Xanthurenic acid	205.037	C10H7NO4	1.75499	3.67876e-06	0.227348	0.0001554	0.000195198	0.0016695	1	1	1	pre:Con	0.239674	down	1866.25	5090.35	7249.38	4611.48	4229.07	3750.15	3795.72	2546.68	656.192	794.392	781.299	1201.3	878.298	942.36	1351.59	928.657	2536.43	3016.24	3177.48	1636.03	2350.35	1	1	Organoheterocyclic compounds	Quinolines and derivatives	HMDB0000881	C02470	-	3	Xanthurenic acid;Zeanic acid;4,6-Dihydroxy-2-quinolinecarboxylic acid	HMDB0000881;HMDB0032963;HMDB0033528	Organoheterocyclic compounds;Organoheterocyclic compounds;Organoheterocyclic compounds
M209T206	209.081	3.4364	5-Hydroxyindole-3-acetic acid	191.058	C10H9NO3	1.35975	0.00110405	0.347617	0.0018648	0.007676	0.009817	0.9375	0.78125	1	pre:Con	0.150184	down	5620.4	11366.9	12847.3	6649.41	2761.89	3579	5990.51	5726.98	1517	1791.09	860.042	2021.78	3089.11	3143.36	4396.95	2140.54	4428.79	5507.48	4220.09	4703.68	3668.24	1	1	Organoheterocyclic compounds	Indoles and derivatives	HMDB0000763	C05635	-	20	3-(3,5-dimethoxyphenyl)prop-2-enoic acid;methyl (2E)-3-(2-hydroxy-4-methoxyphenyl)prop-2-enoate;(3Z)-3-hydroxy-4-(4-hydroxy-3-methoxyphenyl)but-3-en-2-one;4-(3,4-dihydroxy-5-methoxyphenyl)but-3-en-2-one;4-(2,4-dihydroxy-5-methoxyphenyl)but-3-en-2-one;4-(2,4-dihydroxy-3-methoxyphenyl)but-3-en-2-one;1-[3-(4-hydroxy-3-methoxyphenyl)oxiran-2-yl]ethan-1-one;1-hydroxy-4-(4-hydroxy-3-methoxyphenyl)but-3…	HMDB0127491;HMDB0131169;HMDB0133456;HMDB0133458;HMDB0133459;HMDB0133460;HMDB0133461;HMDB0133462;HMDB0133474;HMDB0138526;HMDB0142179;HMDB0012127;HMDB0029185;HMDB0034315;HMDB0036055;HMDB0037308;HMDB0038510;HMDB0040892;HMDB0041461;HMDB0041692	Unknow;Phenylpropanoids and polyketides;Phenylpropanoids and polyketides;Phenylpropanoids and polyketides;Phenylpropanoids and polyketides;Phenylpropanoids and polyketides;Benzenoids;Phenylpropanoids and polyketides;Benzenoids;Unknow;Phenylpropanoids and polyketides;Phenylpropanoids and polyketides;Benzenoids;Phenylpropanoids and polyketides;Organoheterocyclic compounds;Organoheterocyclic compoun…
M209T304	209.08	5.06672	Sinapoyl aldehyde	208.074	C11H12O4	1.85488	0.000164392	0.155527	0.0003108	0.00214474	0.00269381	0.984375	0.921094	1	pre:Con	0.0349582	down	5846.79	39390.4	56845.4	25132.6	14112.2	14255	23752.1	9672.59	3675.34	884.27	2409.44	7155.91	5326.19	2145.89	3936.03	3862.71	12889.1	12756.2	12311.2	12628.6	13526.6	1	1	Benzenoids	Phenols	METPA0625	C05610	-	20	3-(3,5-dimethoxyphenyl)prop-2-enoic acid;methyl (2E)-3-(2-hydroxy-4-methoxyphenyl)prop-2-enoate;(3Z)-3-hydroxy-4-(4-hydroxy-3-methoxyphenyl)but-3-en-2-one;4-(3,4-dihydroxy-5-methoxyphenyl)but-3-en-2-one;4-(2,4-dihydroxy-5-methoxyphenyl)but-3-en-2-one;4-(2,4-dihydroxy-3-methoxyphenyl)but-3-en-2-one;1-[3-(4-hydroxy-3-methoxyphenyl)oxiran-2-yl]ethan-1-one;1-hydroxy-4-(4-hydroxy-3-methoxyphenyl)but-3…	HMDB0127491;HMDB0131169;HMDB0133456;HMDB0133458;HMDB0133459;HMDB0133460;HMDB0133461;HMDB0133462;HMDB0133474;HMDB0138526;HMDB0142179;HMDB0012127;HMDB0029185;HMDB0034315;HMDB0036055;HMDB0037308;HMDB0038510;HMDB0040892;HMDB0041461;HMDB0041692	Unknow;Phenylpropanoids and polyketides;Phenylpropanoids and polyketides;Phenylpropanoids and polyketides;Phenylpropanoids and polyketides;Phenylpropanoids and polyketides;Benzenoids;Phenylpropanoids and polyketides;Benzenoids;Unknow;Phenylpropanoids and polyketides;Phenylpropanoids and polyketides;Benzenoids;Phenylpropanoids and polyketides;Organoheterocyclic compounds;Organoheterocyclic compoun…
M339T312	339.252	5.19597	5Z,8Z,14Z-eicosatrienoic acid	338.246	C20H34O4	1.67007	0.00360101	0.123031	0.0003108	0.0174671	0.00269381	0.984375	0.9375	1	pre:Con	0.0116838	down	4345.39	47173	77317.2	28551.6	10894.5	9269.38	6496.64	4077.02	3491.58	3284.17	3396.09	1158.95	2370.56	3690.44	4302.48	1450.87	12889.6	13172.9	13125.2	13300.8	13206.6	1	1	Lipids and lipid-like molecules	Fatty Acyls	HMDB0002314	C14774	-	19	14,15-DiHETrE;8,9-DiHETrE;11,12-DiHETrE;5,6-DHET;12-Keto-tetrahydro-leukotriene B4;10,11-dihydro-leukotriene B4;6,7-dihydro-12-epi-LTB4;Sterebin E;15-Hydroperoxyeicosa-8Z,11Z,13E-trienoate;MG(0:0/i-15:0/0:0);MG(0:0/a-15:0/0:0)[rac];MG(a-15:0/0:0/0:0)[rac];MG(i-15:0/0:0/0:0);MG(0:0/15:0/0:0);MG(15:0/0:0/0:0);(+)-15,16-Dihydroxyoctadecanoic acid;(9S,10S)-9,10-dihydroxyoctadecanoate;3-dehydrosphinga…	HMDB0002265;HMDB0002311;HMDB0002314;HMDB0002343;HMDB0002995;HMDB0012504;HMDB0012838;HMDB0035379;HMDB0060106;HMDB0072849;HMDB0072862;HMDB0072865;HMDB0072878;HMDB0011532;HMDB0011563;HMDB0031008;HMDB0059633;HMDB0062571;HMDB0062807	Lipids and lipid-like molecules;Lipids and lipid-like molecules;Lipids and lipid-like molecules;Lipids and lipid-like molecules;Lipids and lipid-like molecules;Lipids and lipid-like molecules;Lipids and lipid-like molecules;Lipids and lipid-like molecules;Lipids and lipid-like molecules;Lipids and lipid-like molecules;Lipids and lipid-like molecules;Lipids and lipid-like molecules;Lipids and lipi…
[truncated: 6 more columns]
