# Supplementary material for: Assessing Urinary Metabolomics in Giant Pandas Using Chromatography/Mass Spectrometry: Pregnancy-Related Changes in the Metabolome
Source: Front Endocrinol (Lausanne). 2020 Apr 16;11:215. doi: 10.3389/fendo.2020.00215 (PMC7176934; doi:10.3389/fendo.2020.00215)
Supplement: Supplementary file 5 [file Table_5.xlsx]

## Sheet: Sheet1
Table S5 Differential metabolites were found in the negative-ion mode.
ID	MZ	RT	MS2Metabolite	Molecular weight	chemical_formula	VIP	t.test_p.value	ratio	wilcox.test_p.value	t.test_p.value_BHcorrect	wilcox.test_p.value_BHcorrect	roc	lowROC	upROC		sample	cv	regulated	Con_1	Con_2	Con_3	Con_4	Con_5	Con_6	Con_7	Con_8	pre_1	pre_2	pre_3	pre_4	pre_5	pre_6	pre_7	pre_8	QC_1	QC_2	QC_3	QC_12	QC_21	IsAnnotated	IsMS2ident		MS2superclass	MS2class	MS2hmd	MS2kegg	MS2lipidmaps	NumberMS1hmdb	MS1hmdbName
M101T59	101.023	0.982817	2-Ketobutyric acid	102.032	C4H6O3	1.93752	1.27525e-06	7.04361	0.0001554	5.83554e-05	0.00128475	1	1	1		pre:Con	0.0476494	up	9037.97	7622.98	7983.33	6585.49	5685.31	9131.75	25778.7	20978	36158.1	76481.9	96690.3	88250.3	97123.7	72738.9	94085.4	92143.4	46991.7	51131.7	46321.8	45298.3	46557.3	1	1		Organic acids and derivatives	Keto acids and derivatives	HMDB0000005	C00109	-	0	-
M107T243	107.048	4.05107	p-Cresol	108.058	C7H8O	1.08251	0.000105783	2.02568	0.0003108	0.00111793	0.00209458	0.984375	0.9375	1		pre:Con	0.0458169	up	9275.2	7453.98	6466.07	5235.79	4368.59	4777.72	5769.52	7615.26	7888.45	10677.1	9386.23	14059.4	15748.1	14479.6	16881.9	14112.2	7635.93	7556.84	8194.16	7770.82	8384.57	1	1		Benzenoids	Phenols	HMDB0001858	C01468	-	0	-
M115T64	115.002	1.06952	Maleic acid	#N/A	#N/A	1.41042	7.25181e-05	3.15338	0.0001554	0.000886095	0.00128475	1	1	1		pre:Con	0.16129	up	9386.6	5158.09	6161.79	4354.03	4194.69	2594.36	2182.78	3286.68	16270.5	16362.6	18608.3	10065.3	9973	11734.5	25231.5	9435.1	5696.64	5950.56	5734.27	8025.72	5768.76	1	1		Organic acids and derivatives	Carboxylic acids and derivatives	HMDB0000176	C01384	-	0	-
M116T167	116.07	2.77572	Betaine	117.079	C5H11NO2	1.20775	0.00387137	2.33296	0.0029526	0.0145838	0.0109981	0.921875	0.75	1		pre:Con	0.139237	up	4219.72	1062.12	576.054	2215.67	2666.49	2379.15	711.964	1758.15	4093.83	3826.99	3610.46	4647.47	6398.35	3706.42	3584.92	6500.77	2445.86	3018.79	2146.14	2665.25	2250.46	1	1		Organic acids and derivatives	Carboxylic acids and derivatives	HMDB0000043	C00719	-	0	-
M117T90	117.018	1.5066	Methylmalonic acid	118.027	C4H6O4	1.47005	0.00111745	3.2472	0.0010878	0.00581076	0.0051771	0.953125	0.8125	1		pre:Con	0.0767498	up	14685.8	5433.85	5747.13	3469.22	3815.12	8477.79	25809	23322.8	28776.7	25547.2	17688.9	44006.6	43845.7	42130.6	58013.3	34708.7	16793.5	18678.1	15537.8	18473.1	16681.7	1	1		Organic acids and derivatives	Carboxylic acids and derivatives	HMDB0000202	C02170	-	2	Kynuramine;2-(1,2-Diamino-1-propenyl)phenol
M124T52	124.006	0.8643	Taurine	125.015	C2H7NO3S	1.32458	0.00614223	2.84333	0.0001554	0.0203231	0.00128475	1	1	1		pre:Con	0.0346695	up	1609.74	21665.5	24281.3	17687.4	17089.4	16690	19761.2	15099.2	43025	65941.7	78453.4	35039.7	44269	31490.1	28571.4	53884.9	23144.7	22371.7	24466.1	24057.6	23402.2	1	1		Organic acids and derivatives	Organic sulfonic acids and derivatives	HMDB0000251	C00245	-	4	4-Oxo-4-(3-pyridyl)-butanamide;BOX B;BOX A;Phenacemide
M128T64	128.034	1.0666	Pyroglutamic acid	129.043	C5H7NO3	1.16342	3.701e-05	2.21273	0.0001554	0.000560788	0.00128475	1	1	1		pre:Con	0.117153	up	7235.65	4221.35	6715.77	8068.1	10599	9567.19	9021.62	7708.61	14612	12729.4	19278.6	18970	18594.2	20021.9	24072.9	11426.6	9997	11343.5	10849.3	12207	13551.2	1	1		Organic acids and derivatives	Carboxylic acids and derivatives	HMDB0000267	C01879	-	0	-
M131T175	131.069	2.9122	2-Methylpropanal	87.0684	C4H9NO	1.08897	0.0020884	2.08993	0.004662	0.00914389	0.0157152	0.90625	0.671875	1		pre:Con	0.24352	up	14342.6	5927.53	4087.3	5927.67	3019.23	3357.76	3324.71	5623.22	16671.3	13419.8	17868.5	8043.72	8897.34	10858.6	11098.2	8464.1	6317.68	6072.28	5887.83	9889.05	6339.28	1	1		Organooxygen compounds	Carbonyl compounds	HMDB0031243	C03219	-	2	Tacrine;4,4'-Methylenedianiline
M133T57	133.012	0.954767	D-Malic acid	134.022	C4H6O5	2.38905	4.73246e-12	19.245	0.0001554	4.33115e-08	0.00128475	1	1	1		pre:Con	0.0551777	up	13705.2	7382.01	7542.37	8339.02	9085	10006.8	14848.4	13093	101929	211227	236591	200667	211083	193916	255869	205333	96518.3	108638	99743.7	94279.1	101681	1	1		Lipids and lipid-like molecules	Fatty Acyls	HMDB0031518	C00497	-	0	-
M137T216	137.022	3.60201	4-Hydroxybenzoic acid	138.032	C7H6O3	1.21625	4.29419e-05	0.415819	0.0001554	0.000615995	0.00128475	1	1	1		pre:Con	0.0390107	down	37139.4	26003.2	50775.4	37909	24327.4	22409.3	22189	25145	8085.46	17066.8	18995.2	12269.7	12564.9	9306.24	10123.2	13837.4	19495.8	20422.3	18584.9	19430.2	20393.1	1	1		Benzenoids	Benzene and substituted derivatives	HMDB0000500	C00156	-	0	-
M145T219	145.049	3.64814	Adipic acid	146.058	C6H10O4	1.25984	0.00708919	3.98013	0.0206682	0.0226064	0.0511923	0.84375	0.601172	1		pre:Con	0.0875956	up	4059.25	1623.03	2102.17	1716.03	2737.26	2613.63	2384.75	3615.03	3556.3	2585.13	2519.04	17766	18233.4	9528.35	17621.8	11180.2	5178.72	5630.17	4513.05	4738.65	4831.08	1	1		Lipids and lipid-like molecules	Fatty Acyls	HMDB0000448	C06104	-	5	Prilocaine;ID11614;benzisothiazole piperazine;Asparaginyl-Serine;Serylasparagine
M145T58	145.012	0.963767	2-Oxopentanedioic acid	146.022	C5H6O5	2.00276	7.79971e-06	7.83188	0.0001554	0.000195754	0.00128475	1	1	1		pre:Con	0.0640744	up	14389.6	27858.8	37967.7	22583.6	16593.6	36524	98705.2	76012.8	142263	318421	396821	327247	370926	305026	373919	354874	196200	211241	183658	182258	184831	1	1		Organic acids and derivatives	Keto acids and derivatives	HMDB00208	C00026	-	0	-
M145T71	145.012	1.18532	2-Oxopentanedioic acid	146.022	C5H6O5	2.10355	0.000293199	9.70268	0.0001554	0.00225492	0.00128475	1	1	1		pre:Con	0.0799861	up	5634.76	8648.14	11512.1	8935.86	552.414	10914.9	30091.3	17462.2	45266.6	98368.7	133148	141001	122701	108007	130728	130421	59053.6	49165.8	50617.4	57840.1	55024	1	1		Organic acids and derivatives	Keto acids and derivatives	HMDB00208	C00026	-	3	5-Hydroxy-L-tryptophan;Oxitriptan;p-Hydroxyl-ethotoin
M146T52_1	146.044	0.86505	L-Glutamic acid	147.053	C5H9NO4	1.2588	0.00993281	4.87384	0.000621601	0.0294286	0.00343947	0.96875	0.875	1		pre:Con	0.0611644	up	11224.7	12637.6	17674.3	8139.72	10719.3	9023.64	13111.8	12869	29107.9	113476	182342	17195.3	15111.7	19483.5	19823.8	68425.2	23481.9	25801	26876.1	26502.7	23853.1	1	1		Organic acids and derivatives	Carboxylic acids and derivatives	HMDB0000148	C00025	-	0	-
M147T65	147.028	1.07912	2-Hydroxyglutarate	148.037	C5H8O5	1.33282	0.00307757	2.8243	0.0001554	0.0122407	0.00128475	1	1	1		pre:Con	0.0366488	up	63003.7	35391.5	10783.1	66608.3	91341.9	89541.3	117228	97865.7	145734	280861	330663	137976	172241	166300	176592	204465	116989	119210	124581	115519	113227	1	1		Organic acids and derivatives	Hydroxy acids and derivatives	HMDB0059655	C02630	-	0	-
M153T203	153.017	3.38534	Gentisic acid	154.027	C7H6O4	1.25504	0.000106777	0.359025	0.000621601	0.00112196	0.00343947	0.96875	0.859375	1		pre:Con	0.0457435	down	49398.4	90427.3	80326.1	69228.8	69971.4	67916	25739.7	40932.2	12294.6	18449.8	28644.3	22112.3	28169.8	18261.6	24454.7	24949.9	56536.1	55782.1	52181.3	54233.5	50623.1	1	1		Benzenoids	Benzene and substituted derivatives	HMDB0000152	C00628	-	0	-
M154T49	154.06	0.811867	L-Histidine	155.07	C6H9N3O2	2.18242	8.17085e-05	8.88032	0.0001554	0.000954462	0.00128475	1	1	1		pre:Con	0.0771035	up	633.928	750.61	805.028	524.109	495.414	635.788	6008.07	5264.36	8186.86	16073.3	16978.5	18387.6	13642	19416.8	25952.6	15608.9	6058.16	5903.43	5834.92	5333.52	6608.86	1	1		Organic acids and derivatives	Carboxylic acids and derivatives	HMDB0000177	C00135	-	0	-
M155T87	155.033	1.45043	Hydroquinone	110.037	C6H6O2	1.70348	7.29843e-05	0.167203	0.0001554	0.000887183	0.00128475	1	1	1		pre:Con	0.10319	down	35400.6	12085.2	14872.8	8835.43	5557.72	6543.21	6837.46	9482.81	1574.87	1906.21	2146.49	2014.62	2826.13	2013.26	2048.42	2126.01	5236.58	5141.71	6566.44	6037.05	5624.61	1	1		Benzenoids	Phenols	HMDB0002434	C00530	-	0	-
M163T236	163.038	3.93794	Enol-phenylpyruvate	164.047	C9H8O3	1.74088	4.26581e-05	5.43355	0.0001554	0.00061395	0.00128475	1	1	1		pre:Con	0.0283274	up	5183.62	4080.94	3775.15	11875.7	18352.2	14860.3	4254.45	4214.61	24363.8	20790.2	22231.2	66134.3	50943.7	61786	77229.5	38379.3	21820.8	22129.2	21232.2	22005.2	22961.1	1	1		Benzenoids	Benzene and substituted derivatives	HMDB0012225	C02763	-	1	Ibervirin
M163T255	163.038	4.25582	3-Coumaric acid	164.047	C9H8O3	1.19597	0.00545541	2.85418	0.004662	0.0186646	0.0157152	0.90625	0.710547	1		pre:Con	0.200338	up	88058.3	85877.8	123688	128372	24239.4	48030.9	210638	168716	486534	472986	456498	146075	88906.7	357862	265899	230130	113870	110531	133882	175812	123780	1	1		Phenylpropanoids and polyketides	Cinnamic acids and derivatives	HMDB0001713	C12621	-	1	Ibervirin
M167T59	167.019	0.979117	Uric acid	168.028	C5H4N4O3	1.32014	0.000254078	3.07393	0.0003108	0.00204694	0.00209458	0.984375	0.90625	1		pre:Con	0.0335197	up	27152.7	68293.2	77897.2	62839.2	52898.2	61985	101189	77810.1	324122	300772	293016	112987	85891.8	195608	154149	162835	106053	97886.5	105433	102388	100344	1	1		Organoheterocyclic compounds	Imidazopyrimidines	HMDB0000289	C00366	-	0	-
M167T81	167.019	1.34272	Uric acid	168.028	C5H4N4O3	1.08886	0.0056321	2.76646	0.0029526	0.0191475	0.0109981	0.921875	0.75	1		pre:Con	0.0833821	up	31696.6	77667.6	109055	92911.3	77440	83185	111121	96304.8	534847	171061	141685	78516.8	125017	421582	232290	174483	141804	178663	163411	169377	167558	1	1		Organoheterocyclic compounds	Imidazopyrimidines	HMDB0000289	C00366	-	0	-
M168T49	168.076	0.8099	3-Methylhistidine	169.085	C7H11N3O2	1.81074	1.80094e-05	5.57266	0.0001554	0.000346993	0.00128475	1	1	1		pre:Con	0.0536655	up	1817.87	1368.25	2437	678.068	1473.71	2006.13	5164.69	3888.76	6099.85	9995.23	11118.2	16602	16171.6	11978.7	19008.6	13984	5356.43	5696.26	5572.92	6065.82	6053.07	1	1		Organic acids and derivatives	Carboxylic acids and derivatives	HMDB0000479	C01152	-	0	-
M174T306	174.054	5.09603	Indoleacetic acid	175.063	C10H9NO2	1.6513	0.000174077	4.21526	0.0001554	0.00157265	0.00128475	1	1	1		pre:Con	0.0228696	up	46193.8	14508.5	10478.8	7820.57	9179.49	12456.9	36079.9	37719.7	70831.5	65393.2	56189.7	114806	149463	76237.5	83077	119303	41066.7	39871.8	39534.4	38588.7	39331	1	1		Organoheterocyclic compounds	Indoles and derivatives	HMDB0000197	C00954	-	0	-
M175T427	175.023	7.12298	Mesaconic acid	130.027	C5H6O4	1.78424	1.97948e-05	6.12968	0.0003108	0.000367469	0.00209458	0.984375	0.90625	1		pre:Con	0.20137	up	9331.68	23170.5	23140.6	35777.4	48320.5	69502.8	45922.7	33999.2	345027	302654	56917.2	215537	247152	235713	167287	202205	108212	153545	100112	104729	99619.7	1	1		Lipids and lipid-like molecules	Fatty Acyls	HMDB0000749	C01732	-	0	-
M175T54	175.045	0.895675	Allantoic acid	176.055	C4H8N4O4	1.40193	0.00116204	4.09798	0.0018648	0.00598144	0.00777171	0.9375	0.8125	1		pre:Con	0.0697451	up	9754.97	2597.05	2687.08	3101.11	3108.77	2913.94	5233.51	4788.17	17228.6	13755.5	12422	16466.9	4467.76	30805	38873.5	6068.5	10722.6	9478.4	9269.87	10525	9391.33	1	1		Organic acids and derivatives	Carboxylic acids and derivatives	HMDB0001209	C00499	-	4	N-Acetylcystathionine;Aspartyl-Methionine;Methionyl-Aspartate;gamma-Glutamyl-S-methylcysteine
M182T99	182.044	1.6565	4-Pyridoxic acid	183.053	C8H9NO4	1.54905	4.08508e-06	3.46237	0.0001554	0.000126734	0.00128475	1	1	1		pre:Con	0.0442826	up	60615.8	24348.9	22072	21047.1	27233.8	34547.1	22739.5	32174.9	121223	95850.6	81153.6	106612	110518	108818	124066	99276.1	44985	42973.6	43765.1	39862.8	42604.2	1	1		Organoheterocyclic compounds	Pyridines and derivatives	HMDB0000017	C00847	-	0	-
M188T193	188.033	3.20872	Kynurenic acid	189.043	C10H7NO3	1.5242	6.39856e-05	3.71537	0.0003108	0.000813328	0.00209458	0.984375	0.9375	1		pre:Con	0.0191572	up	28513.5	6871.98	6936.35	11848.9	18773.3	17061	20769.5	22481.1	80068.5	50989	23459.1	76044.1	69632.7	69385.1	70850.8	54664.8	27578.8	28095.7	28792.7	27439.9	28155.1	1	1		Organoheterocyclic compounds	Quinolines and derivatives	HMDB0000715	C01717	-	2	Glycerol 3-phosphate;Beta-Glycerophosphoric acid
M188T89	188.054	1.47585	N-Acetyl-DL-glutamic acid	189.064	C7H11NO5	1.10932	0.0004377	2.15619	0.0029526	0.00295851	0.0109981	0.921875	0.765625	1		pre:Con	0.144331	up	6860.6	2999.49	2358.41	2170.87	4494.6	3021.6	2685.93	3230.8	5372.29	5647.73	4492.15	9860.49	9879.37	8751.49	9467.46	6519.07	3729.07	5204.52	4696.55	5499.7	4520.82	1	1		Organic acids and derivatives	Carboxylic acids and derivatives	HMDB0001138	C00624	-	0	-
M191T79	191.018	1.32274	Citric acid	192.027	C6H8O7	1.97041	0.000146503	7.25285	0.0003108	0.00138656	0.00209458	0.984375	0.9375	1		pre:Con	0.0691058	up	39615.5	48644.2	54885.9	92260.1	137171	223525	587141	401661	537866	1.57001e+06	2.25121e+06	1.19268e+06	2.06614e+06	949530	1.3021e+06	1.62553e+06	891414	772774	770588	802991	873679	1	1		Organic acids and derivatives	Carboxylic acids and derivatives	HMDB0000094	C00158	-	8	(Z)-5-[(5-Methyl-2-thienyl)methylene]-2(5H)-furanone;Citric acid;Isocitric acid;D-threo-Isocitric acid;Diketogulonic acid;2,3-Diketo-L-gulonate;(1R,2R)-Isocitric acid;D-Glucaro-1,4-lactone
M192T239	192.065	3.98436	3-Carbamoyl-2-phenylpropionaldehyde	193.074	C10H11NO3	1.19015	0.00627996	2.38047	0.0001554	0.0206519	0.00128475	1	1	1		pre:Con	0.0351791	up	28282.2	142875	149898	229043	293982	266442	231487	167516	703727	549852	457844	370062	375682	418163	297002	421044	312972	304507	307876	285205	299158	1	1		Benzenoids	Benzene and substituted derivatives	HMDB0060366	C16587	-	0	-
M203T182	203.08	3.03433	Tryptophan	204.09	C11H12N2O2	1.73428	1.54381e-06	4.90628	0.0001554	6.70438e-05	0.00128475	1	1	1		pre:Con	0.0193154	up	3600.22	6485.08	6804.28	4767.27	3877.61	5546.5	13621.5	9173.25	18187.1	24600.4	31103.6	39184	28894.2	38227.1	56937.6	27195.2	15918.2	16486.6	15657.5	15935.7	16151.7	1	1		Organoheterocyclic compounds	Indoles and derivatives	HMDB0000929	C00078	-	2	6-Chloro-N-(1-methylethyl)-1,3,5-triazine-2,4-diamine;Fentanyl
M204T275	204.064	4.57846	Indolelactic acid	205.074	C11H11NO3	1.66447	2.90854e-06	4.22057	0.0001554	0.000100071	0.00128475	1	1	1		pre:Con	0.0160347	up	212684	71779.3	52001.6	67201.6	85095.5	80006	60463	103621	518446	330724	222617	412110	345081	479464	449194	335417	184755	179003	181975	186633	184366	1	1		Organoheterocyclic compounds	Indoles and derivatives	HMDB0000671	C02043	-	0	-
M206T267	206.08	4.4422	N-Acetyl-L-phenylalanine	207.089	C11H13NO3	1.37868	0.000181555	2.78654	0.0001554	0.00161476	0.00128475	1	1	1		pre:Con	0.0184447	up	11899.6	29999.3	35654.7	44879.1	52418.1	51177.1	40367.6	29160.5	79636.1	106117	126502	105081	124726	79463.8	79366.9	122685	59833.4	61634.6	62990	61556	61123.2	1	1		Organic acids and derivatives	Carboxylic acids and derivatives	HMDB0000512	C03519	-	5	N-Acetyl-L-phenylalanine;Phenylpropionylglycine;3-Phenylpropionylglycine;N-isopropylterephthalamic acid;2-Acetamido-4-methylphenyl acetate
M209T54_1	209.028	0.898642	Mucic acid	#N/A	#N/A	1.38783	0.000468613	0.29762	0.0010878	0.00308988	0.0051771	0.953125	0.8125	1		pre:Con	0.0292513	down	149869	175493	186776	95660.5	55862.3	60192.9	55976.2	79547.9	37348.2	50867.9	64345.7	13968.1	15855	21484.4	16721.3	35177.1	58517.2	62285	59776.3	62362.2	62261.7	1	1		Organic oxygen compounds	Organooxygen compounds	HMDB0000639	C00879	-	3	Galactaric acid;Glucaric acid;D-Glucaric acid
M239T47_2	239.113	0.777792	Homocarnosine	240.122	C10H16N4O3	1.4197	0.00118827	3.22954	0.0010878	0.00609928	0.0051771	0.953125	0.8125	1		pre:Con	0.196579	up	2742.06	1367.72	1175.02	1185.07	677.923	473.705	3396.5	3873.39	4652.34	3996.43	2627.07	7095.38	7064.01	8012.34	9852.62	4792.19	3053.96	2299.32	2419.71	3458.93	3566.52	1	1		Organic acids and derivatives	Peptidomimetics	HMDB0000745	C00884	-	28	Anserine;Homocarnosine;Balenine;4-(Methylnitrosamino)-1-(1-oxido-3-pyridinyl)-1-butanone;4-[(Hydroxymethyl)nitrosoamino]-1-(3-pyridinyl)-1-butanone;4-Hydroxy-4-(methylnitrosoamino)-1-(3-pyridinyl)-1-butanone;3a,7a,12b-Trihydroxy-5b-cholanoic acid;3a,4b,7a-Trihydroxy-5b-cholanoic acid;1b,3a,12a-Trihydroxy-5b-cholanoic acid;3a,4b,12a-Trihydroxy-5b-cholanoic acid;3a,6a,7b-Trihydroxy-5b-cholanoic aci…
M293T454	293.209	7.57321	13-OxoODE	294.219	C18H30O3	1.47696	0.00135334	5.41222	0.0003108	0.0066583	0.00209458	0.984375	0.90625	1		pre:Con	0.256684	up	12924.4	10114.9	5329.34	5323.8	6537.75	6340.28	9657.78	9819.28	22265.2	21473.3	11580.9	71427.7	20708.2	65267.8	125357	19383.2	18262.3	17883.9	19408.8	18346	30378.6	1	1		Lipids and lipid-like molecules	Fatty Acyls	HMDB0004668	C14765	-	24	13-OxoODE;9-OxoODE;A-12(13)-EpODE;13-HOTE;15(16)-EpODE;9(10)-EpODE;9-HOTE;17-Hydroxylinolenic acid;10-Oxo-11-octadecen-13-olide;Squamostanal A;15,16-Epoxy-9,12-octadecadienoic acid;(2'E,4'Z,8E)-Colneleic acid;12,13-Epoxy-9,15-octadecadienoic acid;2-Hydroxylinolenic acid;(9S,10E,12Z,15Z)-9-Hydroxy-10,12,15-octadecatrienoic acid;(9Z,12Z,14E)-16-Hydroxy-9,12,14-octadecatrienoic acid;Sterebin D;3,4-D…
M317T94	317.086	1.56593	Arbutin	272.09	C12H16O7	1.49268	0.00256254	0.174254	0.00699301	0.0107284	0.0214765	0.890625	0.671875	1		pre:Con	0.0401714	down	2540.16	18781	21730.1	27801.2	30054.2	36749.4	61247.1	57479.5	4621.53	4176.78	4764.25	8464.27	10742.3	2283.66	3669.75	5953.17	18806.7	20065	17974.5	18626	18818.1	1	1		Organic oxygen compounds	Organooxygen compounds	HMDB0029943	C06186	-	1	Chlorpromazine
M383T91	383.116	1.52283	S-Adenosylhomocysteine	384.122	C14H20N6O5S	1.29316	7.77463e-05	0.348561	0.0003108	0.000923916	0.00209458	0.984375	0.90625	1		pre:Con	0.0904759	down	2623.15	7642.85	9603.59	4898.53	5908.03	3515.07	5309.62	5267.39	1862.75	2459.43	2716.32	1745.83	1370.25	1590.93	2202.4	1656.55	4471.22	3871.85	4255.81	4854.92	4014.8	1	1		Nucleosides, nucleotides, and analogues	5'-deoxyribonucleosides	HMDB0000939	C00021	-	21	6,7-dihydroxy-3-(7-hydroxy-5-methoxy-2,2-dimethyl-3,4-dihydro-2H-1-benzopyran-6-yl)-4H-chromen-4-one;3-(3,7-dihydroxy-5-methoxy-2,2-dimethyl-3,4-dihydro-2H-1-benzopyran-6-yl)-7-hydroxy-4H-chromen-4-one;7,8-dihydroxy-3-(7-hydroxy-5-methoxy-2,2-dimethyl-3,4-dihydro-2H-1-benzopyran-6-yl)-4H-chromen-4-one;5,7-dihydroxy-3-(7-hydroxy-5-methoxy-2,2-dimethyl-3,4-dihydro-2H-1-benzopyran-6-yl)-4H-chromen-4…
M395T425	395.204	7.08232	Pregnenolone sulfate	396.197	C21H32O5S	1.24781	4.39965e-05	0.395078	0.0003108	0.000626215	0.00209458	0.984375	0.90625	1		pre:Con	0.0631385	down	70498.3	86024	93770.4	52883.6	35875.2	47729.2	88475.8	75447.8	29243.2	28962.2	33878.3	22587.9	23810.3	25911.8	17284.1	35893.3	42314.4	38487.1	44648.7	43576.2	45346.1	1	1		Lipids and lipid-like molecules	Steroids and steroid derivatives	HMDB0000774	C18044	-	1	Isopetasoside
M397T142	397.132	2.36622	MGDG 4:0; MGDG(2:0/2:0)	#N/A	#N/A	1.3418	0.00261016	0.241504	0.0018648	0.0108656	0.00777171	0.9375	0.75	1		pre:Con	0.214406	down	10020.6	102609	101354	74239.1	35356.1	30200.1	35686.3	22268.2	17668.9	21722.2	11631.4	4828.63	8784.91	9685.02	8593.13	16521	35301.1	36452.2	22671.3	36195.8	25165.6	1	1		Lipids and lipid-like molecules	Glycerolipids	-	C03692	-	3	Dulxanthone E;5'-Methoxycurcumin;S-adenosyl-L-methioninate
M421T221	421.133	3.67997	Riboflavin	376.138	C17H20N4O6	1.18025	0.000291356	2.38806	0.0010878	0.00224902	0.0051771	0.953125	0.828125	1		pre:Con	0.0470168	up	5488.39	5194.72	4980.8	4724.92	7353.32	7167.34	12598.6	12315.8	18115.7	24989.3	29863.8	13533.7	12569.1	13147.2	11764.8	18879.6	9038.39	9036.06	8872.79	8351.7	8161.71	1	1		Organoheterocyclic compounds	Pteridines and derivatives	HMDB0000244	C00255	-	0	-
M465T406	465.245	6.77479	Androsterone glucuronide	466.257	C25H38O8	1.12397	0.00054783	2.34832	0.0001554	0.00343172	0.00128475	1	1	1		pre:Con	0.140737	up	20372.6	10458.9	8069.01	13839.1	17742.7	15840.1	17707.8	16149.5	76163.9	40252.3	22715.4	25305.3	34314.9	34012.6	23377.7	26078	25804.1	19659.6	19993.2	19515.6	18489.5	1	1		Lipids and lipid-like molecules	Steroids and steroid derivatives	HMDB0002829	C11135	-	4	Androsterone glucuronide;Etiocholanolone glucuronide;5-alpha-Dihydrotestosterone glucuronide;3-alpha-hydroxy-5-alpha-androstane-17-one 3-D-glucuronide
[truncated: 8 more columns]
